# Supplementary material for: A three-group study, internet-based, face-to-face based and standard- management after acute whiplash associated disorders (WAD) – choosing the most efficient and cost-effective treatment: study protocol of a randomized controlled trial
Source: PubMed Central journal article supplement (PMC2722568; doi:10.1186/1471-2474-10-90), 2009-07-22
Supplement: 1471-2474-10-90-S1.pdf [file 1471-2474-10-90-S1.pdf]

| <b>Treatment Module/<br/>Face-to-face sessions</b> | <b>Phases and components</b>                                                              | <b>Clinical strategies</b>                                                                                                                                                                                                                                                                                                                                    | <b>Examples of homework assignments</b>                                          |
|----------------------------------------------------|-------------------------------------------------------------------------------------------|---------------------------------------------------------------------------------------------------------------------------------------------------------------------------------------------------------------------------------------------------------------------------------------------------------------------------------------------------------------|----------------------------------------------------------------------------------|
| <b>A</b>                                           | <b>1. Problem- and goal identification</b><br><br>Introduction: purpose, responsibilities | The Patient Goal Priority Questionnaire. Creation of a goal priority list including:<br>- Behavioral goal identification<br>- Goal ranking (importance, frequency, level of difficulty)<br>- Activity level, perceived self-efficacy, fear of performance, readiness to change, and expectations for treatment<br><br>Pain history<br><br>Physical assessment | To complete, modify and reflect over the goal priority list                      |
| <b>B</b>                                           | <b>2. Self-monitoring</b>                                                                 | Selection of first target for treatment<br><br>Tailoring of a self-monitoring diary for prospective recording (e.g. activity, situation, pain, cognitions, motor behavior, consequences)                                                                                                                                                                      | To monitor activity in everyday-life according to agreed quota                   |
| <b>B</b>                                           | <b>3. Functional behavioral analysis</b><br><br>Goal setting                              | Introduction and discussion of hypothesized physical, cognitive, behavioral, psychosocial determinants of disability<br><br>Operationalization of goals and intermediate objectives                                                                                                                                                                           | Continuing self-monitoring<br><br>To engage in a physical activity of own choice |

---

|                |                                              |                                                                                                                                                                                          |                                                                                                                           |
|----------------|----------------------------------------------|------------------------------------------------------------------------------------------------------------------------------------------------------------------------------------------|---------------------------------------------------------------------------------------------------------------------------|
| <b>C, D, E</b> | <b>4. Basic skills acquisition</b>           | Skills constituent to the first target are introduced, trained, and recorded                                                                                                             | To practice basic exercises<br><br>To record dose, perception of success and barriers for exercising in an exercise diary |
| <b>C, D, E</b> | <b>5. Applied skills acquisition</b>         | Basic skills are merged to shape adequate behaviors<br><br>Supervision in a contrived situation at the clinic<br><br>Agreement of quota for applied activities training in everyday-life | To apply skills and practice activities in everyday-life                                                                  |
| <b>F</b>       | <b>6. Generalization</b>                     | Subsequent goals on the priority list are targeted<br><br>Continuing functional behavioral analysis<br><br>Skills acquisition                                                            | See above<br><br>To extend the application of skills to new activities and situations                                     |
| <b>G</b>       | <b>7. Maintenance and relapse prevention</b> | Strategies for maintenance of skills are discussed<br><br>Future risk situations are identified, management strategies are discussed and documented                                      | To document problem-solving strategies                                                                                    |

---
